1 **Short title: Activator ARFs share promoter preferences**

2

3 Jennifer Nemhauser

4 Professor, Biology

5 University of Washington Seattle, WA 98195-1800

6 [jn7@uw.edu](mailto:jn7@uw.edu)

7 206.543.0753

8

9 **Long title: Specificity in auxin responses is not explained by the promoter preferences of**  
10 **activator ARFs**

11

12 Amy Lanctot<sup>1</sup>, Mallorie Taylor-Teeples<sup>1</sup>, Erika A. Oki<sup>1</sup>, Jennifer L. Nemhauser<sup>1,2</sup>

13

14 <sup>1</sup> Department of Biology, University of Washington, Seattle, Washington 98195

15

16 <sup>2</sup> For correspondence: [jn7@uw.edu](mailto:jn7@uw.edu)

17

18 **Abstract**

19

20 Auxin is essential for almost every developmental process within plants. How a single small

21

22 molecule can lead to a plethora of downstream responses has puzzled researchers for

23

24 decades. It has been hypothesized that one source for such diversity is distinct promoter-

25

26 binding and activation preferences for different members of the AUXIN RESPONSE FACTOR

27

28 (ARF) family of transcription factors. We systematically tested this hypothesis by engineering

29

30 varied promoter sequences in a heterologous yeast system and quantifying transcriptional

31

32 activation by ARFs from two species, *Arabidopsis thaliana* and *Zea mays*. By harnessing the

33

34 user-defined and scalable nature of our synthetic system, we elucidated promoter design rules

35

36 for optimal ARF function, discovered novel ARF-responsive promoters, and characterized the

37

38 impact of ARF dimerization on their activation potential. We found no evidence for specificity in

39

40 ARF-promoter interactions, suggesting that the diverse auxin responses observed in plants may

41

42 be driven by factors outside the core auxin response machinery.

43

44

45 **Introduction**

46

47 Promoter architecture is a key determinant of specificity in the activation of downstream genetic

48

49 networks. Animal steroid hormone receptors are perhaps the best-understood model for how a

50

51 common ancestral transcription factor can diverge to produce multiple proteins with high

38 selectivity for distinct promoter sequences (McKeown et al., 2014). In plants, hormone response  
39 is essential to plant growth and development and also involves large gene families, particularly  
40 in the auxin response. Whether a similar evolutionary trajectory is at work in the auxin response  
41 has been a long-standing question. When auxin enters the nucleus, AUXIN/INDOLE-3-ACETIC  
42 ACID (Aux/IAA) co-repressor proteins are degraded, relieving repression on AUXIN  
43 RESPONSE FACTOR (ARF) transcription factors and allowing them to induce the transcription  
44 of downstream genes (Chapman and Estelle, 2009). It has been hypothesized that different  
45 ARFs bind to and activate on distinct promoters and that this is how an auxin signal can lead to  
46 a diversity of transcriptional responses (Boer et al., 2014; O'Malley et al., 2016).

47  
48 ARFs are comprised of large gene families in most angiosperms (Remington et al., 2004), and  
49 the subset of ARFs that activate transcription likely do so through multiple mechanisms. The  
50 AUXIN RESPONSE FACTOR (ARF) family of transcription factors has 23 members in  
51 *Arabidopsis*, five of which are classified as activators (Guilfoyle and Hagen, 2007). *Zea mays*  
52 has 33 expressed ARFs, thirteen of which cluster with the activator clade in *Arabidopsis* (Galli et  
53 al., 2015). AtARF5 has been shown to recruit chromosome-remodeling ATPases to change  
54 nucleosome occupancy on actively transcribed promoters (Wu et al., 2015), and AtARF7 and  
55 AtARF19 can interact with Mediator subunits (Ito et al., 2016). ARFs bind DNA as dimers and  
56 loss of dimerization leads to decreased DNA binding (Boer et al., 2014) and activity (Pierre-  
57 Jerome et al., 2016).

58  
59 While the activator ARFs are co-expressed within many cells (Rademacher et al., 2011), they  
60 have distinct developmental roles (Krogan et al., 2016; Wilmoth et al., 2005). For example,  
61 AtARF5 regulates embryonic and primary root development (Hardtke and Berleth, 1998;  
62 Schlereth et al., 2010) while AtARF7 and AtARF19 regulate lateral root development (Okushima  
63 et al., 2005; Okushima et al., 2007). These distinct roles may be mediated by differing promoter

64 preferences among the ARFs, allowing them to activate different target genes. ARFs bind to the  
65 auxin-responsive cis-element, or AuxRE. This sequence was first described in *Pisum sativum*  
66 as the six-mer TGTCTC/GAGACA (Ballas et al., 1993); however, further work revealed that  
67 there is some flexibility in the fifth and sixth base pairs. Though all activator ARFs can bind to  
68 the canonical AuxRE sequence *in vitro*, promoter context may allow for specificity in ARF-  
69 promoter interactions *in vivo*. For instance, auxin response in several *Glycine max* promoters  
70 requires an AuxRE but additionally require an upstream constitutive activation sequence,  
71 suggesting that surrounding sequences can influence both auxin-inducibility and strength of  
72 transcriptional response (Ulmasov et al., 1995).

73  
74 Several recent studies that focus on cross-clade comparisons, particularly between the Class A  
75 (“activator”) and Class B (“repressor”) ARFs, support a model of ARF-specific binding  
76 preferences. High-resolution crystal structures of ARF DNA-binding domains and *in vitro* binding  
77 assays suggest that AtARF5 (Class A) and AtARF1 (Class B) homodimers exhibit different  
78 stringency in the numbers of nucleotides between pairs of binding sites (Boer et al., 2014) on  
79 which they can activate. Similar results are reported in DAP-seq data in maize and *Arabidopsis*,  
80 which reveal distinct spacing and orientation preferences for Class A versus Class B ARFs  
81 (O’Malley et al. 2016, Galli et al., 2018). While the DAP-seq studies have led to a wealth of  
82 information on ARF binding, their analytical power is limited to the variation found within native  
83 genomes. In addition, DAP-seq clusters a large number of DNA fragments according to  
84 investigator hypotheses about functional features, leaving open the possibility that differences in  
85 promoter structure are missed. Another complication in interpreting these data is that  
86 transcription factor binding to DNA and activation at a given locus are often decoupled (Para et  
87 al., 2014).

88

89 To complement these ARF binding studies, we tested the activation profile of Class A ARFs  
90 from *Arabidopsis* and maize on synthetic, user-defined promoter sequences using a  
91 heterologous yeast activation system (Pierre-Jerome et al., 2014). This approach allowed us to  
92 test the hypothesis that the observed differences in transcriptional profiles induced by different  
93 ARFs might reflect differences in ARF activity on distinct promoters. We conducted our assays  
94 in a pairwise fashion, looking at each ARF-promoter interaction individually, on standardized  
95 promoter variants to directly test how of promoter architecture affects activity. The synthetic  
96 system also allows us to survey a sequence space unreachable by *in planta* studies that are  
97 limited to native promoters. We queried the activity of two subclades of Class A ARFs, the  
98 AtARF5 clade (ZmARF4 and ZmARF29) and the AtARF19 clade (ZmARF27). We found that  
99 Class A clade ARFs across species largely shared promoter preferences, and additionally found  
100 that AtARF19 was the only ARF tested to be able to activate transcription on promoters with a  
101 single AuxRE. Promoter preferences were shared across subclades of ARFs as well as  
102 conserved between *Arabidopsis* and maize.

103

## 104 **Results**

105

106

### 107 **Class A ARFs prefer similar promoter architectures in terms of cis-element number and** 108 **orientation**

109 A long-standing question in the field of auxin biology is how different members of the ARF gene  
110 family regulate different genes. Several studies have shown that ARFs bind to and activate on  
111 different promoter sequences to varying degrees (Boer et al., 2014; Pierre-Jerome et al., 2016),  
112 giving rise to the hypothesis that ARF-promoter interactions may lead to specificity in  
113 downstream response. We used flow cytometry on engineered yeast to test how Class A ARFs  
114 from two clades, the AtARF5 and AtARF19 clades, activate on synthetic promoter variants  
115 (Figure 1A). All sequence variants were embedded within the same genomic context: the first

116 300-base pairs of the *Arabidopsis thaliana* IAA19 promoter with all five putative auxin  
117 responsive elements (AuxREs) mutated (mplAA19). None of the ARFs tested can activate  
118 transcription to any appreciable extent on the mplAA19 promoter (Supplemental Figure S1).  
119 Variants were specifically embedded at the A1 position, an AuxRE 166 base pairs from the  
120 transcriptional start site (TSS) (Pierre-Jerome et al., 2016). This region relative to the TSS has  
121 been shown to be enriched for AuxREs within the *Arabidopsis* genome (Lieberman-Lazarovich  
122 et al., 2019).

123  
124 We first tested how the copy number of AuxREs within a promoter affects activation by AtARF5  
125 and AtARF19. We generated three copy number variants, with two to four copies of the  
126 canonical forward-facing AuxRE TGTCTC. A five base pair spacer CCTTT separated these  
127 AuxREs, which is the spacer sequence in the commonly used auxin-responsive DR5 reporter  
128 (Ulmasov et al., 1997b). We found that the activation strength of both AtARF5 and AtARF19  
129 was directly proportional to AuxRE copy number, with the highest activation by both ARFs on  
130 the promoter with four AuxREs (Figure 1B). It is worth noting that AtARF5 activation was  
131 significantly lower than that of AtARF19, making it difficult to assess whether it was able to  
132 activate at all on promoters with less than four AuxREs, and that background activity also  
133 increases with increased AuxRE copy number.

134  
135 We next tested how the orientation of AuxREs relative to each other and to the TSS affects  
136 activation. For this we generated two sets of two promoter variants (four total) all containing two  
137 AuxREs. In the first set, we tested whether ARFs activated more strongly on two AuxREs facing  
138 towards each other, separated by seven base pairs, or two AuxREs facing away from each  
139 other, separated by the same seven base pair sequence. We used the canonical AuxRE  
140 sequence TGTCTC and the spacer sequence from the ER7 auxin reporter, CCAAAGG. We  
141 found that all the tested ARFs activated more strongly on two AuxREs facing towards each  
142 other rather than away from each other (Figures 1C and 1D), and neither AtARF5 nor the tested

143 ZmARFs showed appreciable activation when the two AuxREs were facing away from each  
144 other compared to the background yeast activation.

145  
146 We also examined AtARF5 and AtARF19 activation on two promoters with two AuxREs facing  
147 either towards the TSS or away from the TSS. In these promoter variants the AuxREs were  
148 spaced by five nucleotides, and the spacer sequence was the one used previously in DR5  
149 reporters. We found that AtARF19 activated slightly more strongly when AuxREs face towards  
150 the TSS as opposed to away from the TSS (Figure 1E). AtARF5 did not activate on two AuxREs  
151 facing either towards or away from the TSS when compared to background yeast activation,  
152 indicating that AtARF5 is a weaker activator than AtARF19. None of the ZmARFs strongly  
153 activate on two AuxREs facing away from the TSS, while ZmARF27 and ZmARF29 activate to  
154 some degree on two AuxREs facing towards the TSS (Figure 1F). Interestingly, this is the only  
155 orientation on which ZmARF29 appreciably activated. Of note, background activation increases  
156 on two AuxREs facing towards the TSS, but comparison to a control strain of yeast expressing  
157 no ARFs allows the determination of ARF-dependent activation. All of the ARFs we tested  
158 activated most strongly on two AuxREs facing towards each other, and activated weakly or not  
159 at all on two AuxREs in any other orientation. This is the orientation for the solved structures of  
160 the AtARF5 and the Class B AtARF1 DNA-binding domains (Boer et al., 2014).

161  
162 **AtARF5 more strongly activates on the AuxRE TGTCGG than the canonical cis-element**

163 **TGTCTC**

164 While the canonical AuxRE is widely considered to be the TGTCTC and its reverse complement  
165 GAGACA, the “core” element is TGTC/GACA and auxin responsiveness has been seen on a  
166 wide variety of cis-elements with varying base pairs in the fifth and sixth positions. AtARF1 and  
167 AtARF5 in fact bind most strongly to the AuxRE TGTCGG and its reverse on two AuxREs facing  
168 towards each other (Boer et al., 2014). Additionally, DR5 reporters using different AuxRE  
169 sequences showed variable activation in a transient expression assay (Lieberman-Lazarovich et

170 al., 2019). We tested how AuxRE sequence impacts activation by AtARF5 and AtARF19 on two  
171 AuxREs facing towards each other by comparing activation on the AuxREs TGTCTC/GAGACA  
172 and on the AuxREs TGTCGG/CCGACA. We found that all tested ARFs activate more strongly  
173 on the TGTCGG/CCGACA AuxREs (Figures 2A and 2B). The difference in AtARF5 activation  
174 on the canonical AuxRE sequence and the novel sequence, nearly a nine-fold increase, was  
175 striking. In combination with previous protein binding microarray data (Boer et al., 2014), this  
176 may suggest AtARF5 has a strong preference for activation on TGTCGG/CCGACA, at least  
177 with this promoter orientation and spacer. Similarly, while the maize ARF5-like protein ZmARF4  
178 does not activate well on TGTCTC/GAGACA, it does show transcriptional activity on the  
179 TGTCGG/CCGACA AuxREs at levels similar to ZmARF27. These results again do not show  
180 divergent promoter preferences among ARFs—while the relative degree of preference may  
181 differ between ARFs, they all activate more strongly on the same promoter variant.

182

### 183 **AtARF19 can activate on a single AuxRE in yeast**

184 Our results suggested that the AuxRE sequence TGTCGG and its reverse complement may be  
185 more optimal than the canonical AuxRE for ARF activation on the promoter. While common  
186 synthetic auxin responsive reporters have high copy numbers of AuxREs within a short  
187 sequence, in native auxin responsive promoters it is rare for two AuxREs to occur close  
188 together (Grigolon et al., 2018). To test whether ARFs can activate on a single AuxRE we  
189 placed the single AuxRE TGTCGG into the A1 site of the mutated pIAA19 promoter. Previous  
190 work from our lab showed that *Arabidopsis* ARFs cannot activate on a single AuxRE sequence  
191 that is natively in this position in the IAA19 promoter (TGTCGA) (Pierre-Jerome, 2016). To our  
192 surprise, we found that only AtARF19 was able to activate on this single AuxRE (TGTCGG)  
193 (Figures 2C and 2D). In fact AtARF19 activated almost as strongly on this promoter as it did  
194 when there were two TGTCGG AuxREs.

195

196 **Dimerization is required for ARF activity on single AuxRE promoters**

197 ARFs have two dimerization domains, one at the N-terminus flanking the DNA-binding domain  
198 (termed the DD) (Boer et al., 2014) and one at the C-terminus (a Phox and Bem1 or PB1  
199 domain) (Korasick et al., 2014, Nanao et al., 2014). Structural studies indicate that ARFs require  
200 dimerization at the DD to bind to DNA (Boer et al., 2014). In addition, mutations in either DD or  
201 PB1 of AtARF19 reduce ARF activity (Pierre-Jerome, 2016), though these studies only  
202 addressed ARF behavior on promoters with multiple AuxREs. We tested the activity of AtARF19  
203 mutations that disrupt ARF dimerization in either the DD (G247I and A50N) or the PB1 domain  
204 (termed ARF19 KO—a triple mutation K962A; D1012A; D1016A) (Pierre-Jerome, et al. 2016)  
205 and compared these to the activity of a DNA-binding mutant AtARF19 H138A (Figure 3A, B).  
206 The dimerization mutations caused a loss of activation on the single AuxRE (TGTCGG)  
207 promoter to nearly the same extent as the DNA-binding mutation (Figure 3C), suggesting that  
208 dimerization is necessary for ARF activation on the promoter despite the presence of only a  
209 single optimal binding site. Interestingly, when we tested the activity of these dimerization  
210 mutants on the two TGTCGG AuxREs facing towards each other, they caused a loss of  
211 activation but not to the same extent as on the single AuxRE, suggesting that multiple AuxRE  
212 sites may compensate for a loss of dimerization of the ARFs themselves. As ARFs were  
213 crystallized as a dimer pair with each monomer bound to a separate AuxRE (Boer et al., 2014),  
214 how an ARF dimer contacts the DNA when there is a single AuxRE present is unknown. It is  
215 possible that only a single ARF-AuxRE interaction is required to bring the dimer to the DNA, and  
216 the other ARF forms transient interactions with multiple DNA sequences, which may serve as  
217 cryptic, low-affinity binding sites. Or the proximity of ARFs within a dimer pair may allow one to  
218 bind a single AuxRE promoter as soon as the other falls off, increasing the on rate of ARF  
219 binding to the promoter.

220



221 **AtARF19 has a unique residue in the dimerization domain required for activity on a single**

222 **AuxRE**

223 Alignments among *Arabidopsis* and maize ARFs (Figure 3A) showed a difference in sequence  
224 within the DD of AtARF19 when compared to its maize homologues ZmARF27 and ZmARF35  
225 (Figure 3B). We hypothesized that this single residue difference, so close to the monomer-to-  
226 monomer contact residues within the DD, could explain AtARF19's unique ability to activate  
227 transcription on promoters with only a single AuxRE. To test this, we generated a mutated form  
228 of AtARF19 that replaced the asparagine residue with an alanine, the same amino acid found in  
229 ZmARF27 (N256A). This single residue change abolished AtARF19 activity on a single AuxRE,  
230 while leaving its activity on a two-AuxRE promoter essentially unchanged (Figure 3D). The  
231 polarity of the asparagine may help stabilize the dimeric form of AtARF19, leading to higher  
232 transcriptional activation overall and greatly increasing the number of potential promoters it can  
233 act on. While N256 is necessary for AtARF19's ability to activate on promoter with a single  
234 AuxRE, it is not sufficient. AtARF7, which shares the same asparagine residue in its DD, cannot  
235 activate on a single AuxRE (Supplemental Figure S2). This difference, in combination with the  
236 critical role of the PB1 domain in ARF transcriptional activation (Figure 3C), implicates the still  
237 poorly understood inter-domain interactions in determining overall protein function.

238

239 **Discussion**

240

241 It has been widely speculated that specificity within ARF-promoter interactions is responsible for  
242 the observed diversity in transcriptional and developmental responses triggered by auxin. Our  
243 results suggest that this model is unlikely to be true, at least among Class A ARFs. All the ARFs  
244 tested showed similar promoter preferences, and all required dimerization for full activity. We  
245 were able to elucidate a set of promoter design rules for maximizing response across the A  
246 clade, and found that these design rules were conserved across *Arabidopsis* and maize. Simply  
247 stated, these rules are as follows: (1) ARFs most strongly activate on promoters with at least

248 four AuxREs arranged facing towards one another (Figure 1); (2) the non-canonical TGTCGG  
249 sequence can further boost expression, especially by ARFs in the AtARF5 clade (Figure 2). This  
250 second rule has relevance for the design and interpretation of auxin reporters. For example,  
251 DR5v2, which uses TGTCGG (Liao et al., 2015), may over-report responses driven by AtARF5  
252 and its homologues relative to other Class A ARFs. Our study also highlights the complexity of  
253 inter-domain interactions within the ARFs, as dimerization at both N- and C-terminal  
254 dimerization domains was found to be critical for maximal transcriptional activation.

255

256 The differences between the architecture of auxin reporters and native auxin responsive  
257 promoters are striking. The rules derived from the systematic analysis presented here are  
258 generally consistent with the construction of auxin reporters, where there is a trend towards high  
259 copy numbers of canonical AuxREs in a short sequence space (Ulmasov et al., 1997a; Ulmasov  
260 et al., 1997b). Closely spaced AuxREs are found only rarely in the *Arabidopsis* genome  
261 (Grigolon et al., 2018), and frequently are neither the ideal sequence nor in the ideal orientation  
262 relative to the TSS. One possible explanation for the rarity of “ideal” auxin promoters is that it  
263 allows for integration of signals from multiple pathways, a hypothesis supported by the  
264 enrichment for transcription factor binding sites for other proteins in auxin-responsive promoters.

265

266 Our results showed that heterodimerization between ARFs is essential for ARF function, but  
267 importantly heterodimerization between ARFs and *other* transcription factors could support ARF  
268 activity on non-ideal native promoters and potentially act as a locus for specificity within auxin  
269 response. Bioinformatics analyses of auxin-induced genes show that many promoters of these  
270 genes are enriched for the binding sites of transcription factors such as bZIPs and bHLHs  
271 (Berendzen et al., 2012; Cherenkov et al., 2018; Mironova et al., 2014). Genetic studies show  
272 that heterodimerization between specific ARFs and members of other transcription factor  
273 families is required for the development of many plant organs, including lateral roots (MYBs;

274 Shin et al., 2007) leaves (bHLHs, Varaud et al., 2011) and fruit (MADS-boxes, Ripoll et al.,  
275 2015). Compound promoter architectures that combine AuxREs with binding sites for other  
276 transcription factors would enable specificity and fit well with observed native promoter  
277 architectures.

278

279 There are many other aspects of auxin signaling that may contribute to specificity in auxin  
280 responses, including differential interactions between ARFs and Aux/IAA repressors (Vernoux et  
281 al., 2011), differential degradation rate of Aux/IAAs (Havens et al., 2012), and variation in which  
282 tissues and at what developmental timepoints ARFs are expressed (Rademacher et al., 2011).  
283 As we continue to elucidate the rules of ARF-activated transcription, synthetic tools should  
284 make it possible to examine each of these aspects in turn. Future efforts that combine synthetic  
285 and native approaches will ultimately be needed to pinpoint the combination of factors that  
286 make up the “auxin code”, as well as to make it possible to retrace the evolutionary path that  
287 connected novel auxin response modules to diversity in plant form and function.

288

## 289 **Materials and Methods**

290

### 291 **Yeast integrating plasmid construction**

292 Oligonucleotides were obtained from Integrated DNA Technologies with standard desalting  
293 purification. All cloning was done by Gibson assembly unless otherwise specified, using  
294 Phusion high-fidelity DNA polymerase. For yeast constructs, all promoter variant fluorescent  
295 reporters were cloned into a URA3-single integrating vector. Promoter variants were ordered as  
296 oligo or block gene fragments with Gibson overhangs and cloned the A1 site of a 300 bp IAA19  
297 promoter sequence with a G→A mutation introduced at the second position of each AuxRE site  
298 (Pierre-Jerome, et al., 2016). Transcription factors were cloned into a HIS3-targeting single  
299 integrating vector under the control of the yeast ADH1 constitutive promoter. Maize ARFs were  
300 cloned in pDONR vectors as described in (Galli et al., 2018). After addition of 5' yeast Kozak

301 sequences (AAA), Gateway cloning (Invitrogen) was employed to integrate ZmARFs into the  
302 HIS3-targeting single integrating vector.

303

#### 304 **Yeast culturing and transformations**

305 W303-1A yeast cells of mating type locus a (Mata) were cultured in yeast peptone dextrose  
306 (YPD), synthetic complete (SC), or synthetic drop out (SDO) media. Media were made  
307 according to standard protocols and supplemented with 80 mg/L adenine. Stably integrating  
308 constructs were transformed using a standard lithium acetate protocol and plated on selective  
309 media plates kept at 30°C. Yeast were glycerol stocked after isostreaking strains on YPD and  
310 PCR confirmation of construct integration.

311

#### 312 **Flow cytometry assays of ARF activity**

313 A freshly grown colony of each yeast strain was inoculated in 1 mL of SC media and grown at  
314 30°C with shaking at 400 rpm in 2,000 µL Eppendorf Deepwell Plates 96. After 16 hours of  
315 growth, cultures were diluted 1:150 into 1 mL fresh SC media. Fluorescence measurements  
316 were taken after 4 to 5 hours of additional growth. The data for at least three independently  
317 grown replicates were pooled for each strain. Fluorescence measurements were taken with a  
318 custom BD Accuri SORP flow cytometer with a CSampler 96-well plate adapter using an  
319 excitation wavelength of 514 nm and an emission detection filter at 545/35 nm. A minimum of  
320 10,000 events above a 40,000 FSC-H threshold was measured for each sample. Experiments  
321 were done in triplicate for each strain. Data were exported as FCS 3.0 files and processed in R  
322 using the flowCore, plyr, and ggplot2 software packages.

323

#### 324 **Supplemental Material**

325 Two supplemental figures:

326 Supplemental Figure S1 Arabidopsis and maize ARFs do not activate on mpIAA19.

327 Supplemental Figure S2 Arabidopsis ARF7 does not activate on a single AuxRE.

328

## 329 **Figure Legends**

330 **Figure 1 Arabidopsis and maize ARFs share promoter preferences.** A) Schematic of yeast  
331 engineered to constitutively express ARF proteins and promoter variants. All promoter variants  
332 were inserted into the A1 site of a pIAA19 promoter with mutated AuxREs. The transcription  
333 start site (TSS) is to the right and arrowheads indicate the orientation of the AuxRE, starting with  
334 5'-TGTC-3'. Fluorescence was measured by flow cytometry with the results depicted as median  
335 values and 95% confidence intervals. B) AtARF19 and AtARF5 show strong activation on  
336 promoters with four AuxREs (five base pair spacer). C) AtARF19 and AtARF5 show stronger  
337 activity on promoters with two AuxREs facing towards each other rather than away from each  
338 other (seven base pair spacer). D) ZmARF4, ZmARF27, and ZmARF29 show stronger activity  
339 on promoters with two AuxREs facing towards each other rather than away from each other  
340 (seven base pair spacer). E) AtARF19 and AtARF5 show stronger activity on promoters where  
341 the two AuxREs face towards rather than away from the TSS (five base pair spacer). F)  
342 ZmARF4, ZmARF27, and ZmARF29 show stronger activity on promoters where the two  
343 AuxREs face towards rather than away from the TSS (five base pair spacer).

344

345 **Figure 2 AtARF19 can activate on a single AuxRE of the sequence TGTCGG.** A) AtARF5  
346 and AtARF19 activate more strongly on two AuxREs facing each other of the cis-element  
347 sequence TGTCTC/GAGACA when compared to two AuxREs facing each other of the cis-  
348 element sequence TGTCGG/CCGACA. B) AtARF19, but not AtARF5, can induce transcription  
349 on a promoter with one AuxRE of the sequence 5'-TGTCGG-3'. C) ZmARF4, ZmARF27, and  
350 ZmARF29 activate more strongly on two AuxREs facing each other of the cis-element sequence  
351 TGTCTC/GAGACA when compared to two AuxREs facing each other of the cis-element  
352 sequence TGTCGG/CCGACA. D) None of the tested ZmARFs activate on a single AuxRE with

353 the cis-element sequence 5'-TGTCGG-3' (The no ARF control data point is directly underneath  
354 the ZmARF4 data point).

355

356 **Figure 3 AtARF19 requires dimerization to activate even on a single AuxRE.** A) Alignment  
357 of the DNA-binding and dimerization domains of AtARF19 and ZmARF27 with relevant  
358 mutations highlighted. B) Structure of ARF5 DNA-binding domain with mutated residues  
359 highlighted. C) AtARF19 must dimerize for full activity, even for a promoter with a single AuxRE.  
360 The KO mutation disrupts dimerization in the PB1 domain. The A250N and G247I mutations  
361 disrupt dimerization at the DD domain, adjacent to the DNA-binding domain. The H138A  
362 mutation disrupts the DNA-binding domain itself. D) An N256A mutation in AtARF19 causes a  
363 total loss of activity on a promoter with one AuxRE (5'-TGTCGG-3'), while leaving activity on  
364 two AuxREs largely intact.

365

366 **Supplemental Figure S1 Arabidopsis and maize ARFs do not activate on mplAA19.** A)  
367 Activity of AtARF5 and AtARF19 on the mplAA19 promoter, with all the AuxREs mutated. B)  
368 Activity of ZmARF4, ZmARF27, and ZmARF29 on the mplAA19 promoter, with all the AuxREs  
369 mutated.

370

371 **Supplemental Figure S2 Arabidopsis ARF7 does not activate on a single AuxRE.** Despite  
372 a conserved asparagine shared with AtARF19 within the DD domain, AtARF7 does not activate  
373 on a single AuxRE of the sequence 5'-TGTCGG-3', but activates on two AuxREs of this  
374 sequence facing each other.

375

### 376 **Acknowledgements**

377 Thank you to members of the Nemhauser and Imaizumi labs for helpful discussion and  
378 guidance on experimental design and execution. Thank you especially to Manraj Sahota, Mollye

379 Zahler, and Arjun Khakhar for initial experimental work and many discussions. This work was  
380 supported by the National Science Foundation (MCB-1411949), and National Institute of Health  
381 (R01- GM107084) and the Howard Hughes Medical Institute Faculty Scholar Award. AL was  
382 supported by an NSF Graduate Research Fellowship DGE-1256082. MMTT was supported by  
383 an NSF Postdoctoral Fellowship in Biology IOS-1609014.

384

### 385 **Author Contributions**

386 Experimental design was conceived by AL, MMTT, and JLN. Research was performed by AL,  
387 MMTT, and EAO. The manuscript was prepared by AL, MMTT, and JLN.

388

### 389 **One-sentence summary**

390 The plant growth hormone auxin regulates development via a family of transcription factors that  
391 share promoter sequence preferences, despite activating different genetic networks.

392

393

394 **Ballas N, Wong LM, Theologis A** (1993) Identification of the auxin-responsive element,  
395 AuxRE, in the primary indoleacetic acid-inducible gene, PS-IAA4/5, of pea (*Pisum sativum*). *J*  
396 *Mol Biol* **233**: 580–596

397 **Berendzen KW, Weiste C, Wanke D, Kilian J, Harter K, Dröge-Laser W** (2012) Bioinformatic  
398 cis-element analyses performed in Arabidopsis and rice disclose bZIP- and MYB-related binding  
399 sites as potential AuxRE-coupling elements in auxin-mediated transcription. *BMC Plant Biol* **12**:  
400 125

401 **Boer DR, Freire-Rios A, van den Berg WAM, Saaki T, Manfield IW, Kepinski S, López-**  
402 **Vidriero I, Franco-Zorrilla JM, de Vries SC, Solano R, et al** (2014) Structural basis for DNA  
403 binding specificity by the auxin-dependent ARF transcription factors. *Cell* **156**: 577–589

404 **Chapman EJ, Estelle M** (2009) Mechanism of auxin-regulated gene expression in plants. *Annu*  
405 *Rev Genet* **43**: 265–285

406 **Cherenkov P, Novikova D, Omelyanchuk N, Levitsky V, Grosse I, Weijers D, Mironova V**  
407 (2018) Diversity of cis-regulatory elements associated with auxin response in Arabidopsis  
408 thaliana. *J Exp Bot* **69**: 329–339

409 **Galli M, Liu Q, Moss BL, Malcomber S, Li W, Gaines C, Federici S, Roshkovan J, Meeley**  
410 **R, Nemhauser JL, et al** (2015) Auxin signaling modules regulate maize inflorescence  
411 architecture. *Proc Natl Acad Sci U S A* **112**: 13372-13377

412 **Galli M, Khakhar A, Lu Z, Chen Z, Sen S, Joshi T, Nemhauser JL, Schmitz RJ, Gallavotti A**  
413 (2018) The DNA binding landscape of the maize AUXIN RESPONSE FACTOR family. *Nature*  
414 *Communications* **9**: 4526

415 **Grigolon S, Bravi B, Martin OC** (2018) Responses to auxin signals: an operating principle for  
416 dynamical sensitivity yet high resilience. *R Soc Open Sci* **5**: 172098

- 417 **Guilfoyle TJ, Hagen G** (2007) Auxin response factors. *Curr Opin Plant Biol* **10**: 453–460
- 418 **Hardtke CS, Berleth T** (1998) The Arabidopsis gene MONOPTEROS encodes a transcription
- 419 factor mediating embryo axis formation and vascular development. *EMBO J* **17**: 1405–1411
- 420 **Havens KA, Guseman JM, Jang SS, Pierre-Jerome E, Bolten N, Klavins E, Nemhauser JL**
- 421 (2012) A Synthetic Approach Reveals Extensive Tunability of Auxin Signaling. *Plant Physiol*
- 422 **160**: 135–142
- 423 **Ito J, Fukaki H, Onoda M, Li L, Li C, Tasaka M, Furutani M** (2016) Auxin-dependent
- 424 compositional change in Mediator in ARF7- and ARF19-mediated transcription. *Proc Natl Acad Sci*
- 425 **113**: 6562–6567
- 426 **Korasick DA<sup>1</sup>, Westfall CS, Lee SG, Nanao MH, Dumas R, Hagen G, Guilfoyle TJ, Jez**
- 427 **JM, Strader LC.**(2014)Molecular basis for AUXIN RESPONSE FACTOR protein interaction and
- 428 the control of auxin response repression. *Proc Natl Acad Sci U S A.* **111**: 5427-32
- 429 **Krogan NT, Marcos D, Weiner AI, Berleth T.**(2016) The Auxin Response Factor
- 430 MONOPTEROS controls meristem function and organogenesis in both the shoot and root
- 431 through the direct regulation of PIN genes. *New Phytol* **212**: 42–50
- 432 **Liao CY, Smet W, Brunoud G, Yoshida S, Vernoux T, Weijers D.** (2015) Reporters for
- 433 sensitive and quantitative measurement of auxin response. *Nat Methods* **12**:207-10
- 434 **Lieberman-Lazarovich M, Yahav C, Israeli A, Efroni I.** (2019) Deep conservation of cis-
- 435 element variants regulating plant hormonal responses. *Plant Cell Epub* ahead of print
- 436 **McKeown AN, Bridgham JT, Anderson DW, Murphy MN, Ortlund EA, Thornton JW** (2014)
- 437 Evolution of DNA specificity in a transcription factor family produced a new gene regulatory
- 438 module. *Cell* **159**: 58–68
- 439 **Mironova VV, Omelyanchuk NA, Wiebe DS, Levitsky VG** (2014) Computational analysis of
- 440 auxin responsive elements in the Arabidopsis thaliana L. genome. *BMC Genomics* **15**: S4
- 441 **Nanao MH, Vinos-Poyo T, Brunoud G, Thévenon E, Mazzoleni M, Mast D, Lainé S, Wang**
- 442 **S, Hagen G, Li H, Guilfoyle TJ, Parcy F, Vernoux T, Dumas R.** (2014) Structural basis for
- 443 oligomerization of auxin transcriptional regulators. *Nat. Communications* **5**:3617.
- 444 **Oh E, Zhu J-Y, Bai M-Y, Arenhart RA, Sun Y, Wang Z-Y** (2014) Cell elongation is regulated
- 445 through a central circuit of interacting transcription factors in the Arabidopsis hypocotyl. *eLife*.
- 446 doi: 10.7554/eLife.03031
- 447 **Okushima Y, Fukaki H, Onoda M, Theologis A, Tasaka M** (2007) ARF7 and ARF19 Regulate
- 448 Lateral Root Formation via Direct Activation of LBD/ASL Genes in Arabidopsis. *Plant Cell* **19**:
- 449 118–130
- 450 **Okushima Y, Overvoorde PJ, Arima K, Alonso JM, Chan A, Chang C, Ecker JR, Hughes B,**
- 451 **Lui A, Nguyen D, et al** (2005) Functional Genomic Analysis of the AUXIN RESPONSE
- 452 FACTOR Gene Family Members in Arabidopsis thaliana: Unique and Overlapping Functions of
- 453 ARF7 and ARF19. *Plant Cell* **17**: 444–463
- 454 **O'Malley RC, Huang SC, Song L, Lewsey MG, Bartlett A, Nery JR, Galli M, Gallavotti A,**
- 455 **Ecker JR** (2016) Cistrome and Epicistrome Features Shape the Regulatory DNA Landscape.
- 456 *Cell* **165**: 1280–1292
- 457 **Para A, Li Y, Marshall-Colón A, Varala K, Francoeur NJ, Moran TM, Edwards MB, Hackley**
- 458 **C, Bargmann BOR, Birnbaum KD, et al** (2014) Hit-and-run transcriptional control by bZIP1
- 459 mediates rapid nutrient signaling in Arabidopsis. *Proc Natl Acad Sci U S A* **111**: 10371–10376
- 460 **Pierre-Jerome E, Jang SS, Havens KA, Nemhauser JL, Klavins E** (2014) Recapitulation of
- 461 the forward nuclear auxin response pathway in yeast. *Proc Natl Acad Sci U S A* **111**: 9407–
- 462 9412
- 463 **Pierre-Jerome E, Moss BL, Lanctot A, Hageman A, Nemhauser JL** (2016) Functional
- 464 analysis of molecular interactions in synthetic auxin response circuits. *Proc Natl Acad Sci U S A*
- 465 **113**: 11354–11359



- 466 **Rademacher EH, Möller B, Lokerse AS, Llavata-Peris CI, van den Berg W, Weijers D**  
467 (2011) A cellular expression map of the Arabidopsis AUXIN RESPONSE FACTOR gene family.  
468 *Plant J Cell Mol Biol* **68**: 597–606
- 469 **Remington DL, Vision TJ, Guilfoyle TJ, Reed JW** (2004) Contrasting Modes of Diversification  
470 in the Aux/IAA and ARF Gene Families. *Plant Physiol* **135**: 1738–1752
- 471 **Ripoll J, Bailey LJ, Mai Q-A, Wu SL, Hon CT, Chapman EJ, Ditta GS, Estelle M, Yanofsky**  
472 **MF** (2015) microRNA regulation of fruit growth. *Nat Plants* **1**: 15036
- 473 **Schlereth A, Möller B, Liu W, Kientz M, Flipse J, Rademacher EH, Schmid M, Jürgens G,**  
474 **Weijers D** (2010) MONOPTEROS controls embryonic root initiation by regulating a mobile  
475 transcription factor. *Nature* **464**: 913–916
- 476 **Shin R, Burch AY, Huppert KA, Tiwari SB, Murphy AS, Guilfoyle TJ, Schachtman DP**  
477 (2007) The Arabidopsis transcription factor MYB77 modulates auxin signal transduction. *Plant*  
478 *Cell* **19**: 2440–2453
- 479 **Ulmasov T, Hagen G, Guilfoyle TJ** (1997a) ARF1, a transcription factor that binds to auxin  
480 response elements. *Science* **276**: 1865–1868
- 481 **Ulmasov T, Liu ZB, Hagen G, Guilfoyle TJ** (1995) Composite structure of auxin response  
482 elements. *Plant Cell* **7**: 1611–1623
- 483 **Ulmasov T, Murfett J, Hagen G, Guilfoyle TJ** (1997b) Aux/IAA proteins repress expression of  
484 reporter genes containing natural and highly active synthetic auxin response elements. *Plant*  
485 *Cell* **9**: 1963–1971
- 486 **Varaud E, Brioudes F, Szécsi J, Leroux J, Brown S, Perrot-Rechenmann C, Bendahmane**  
487 **M** (2011) AUXIN RESPONSE FACTOR8 regulates Arabidopsis petal growth by interacting with  
488 the bHLH transcription factor BIGPETALp. *Plant Cell* **23**: 973–983
- 489 **Vernoux T, Brunoud G, Farcot E, Morin V, Van den Daele H, Legrand J, Oliva M, Das P,**  
490 **Larrieu A, Wells D, et al** (2011) The auxin signalling network translates dynamic input into  
491 robust patterning at the shoot apex. *Mol Syst Biol* **7**: 508
- 492 **Wilmoth JC, Wang S, Tiwari SB, Joshi AD, Hagen G, Guilfoyle TJ, Alonso JM, Ecker JR,**  
493 **Reed JW** (2005) NPH4/ARF7 and ARF19 promote leaf expansion and auxin-induced lateral  
494 root formation. *Plant J Cell Mol Biol* **43**: 118–130
- 495 **Wu M-F, Yamaguchi N, Xiao J, Bargmann B, Estelle M, Sang Y, Wagner D** (2015) Auxin-  
496 regulated chromatin switch directs acquisition of flower primordium founder fate. *eLife*. doi:  
497 10.7554/eLife.09269  
498

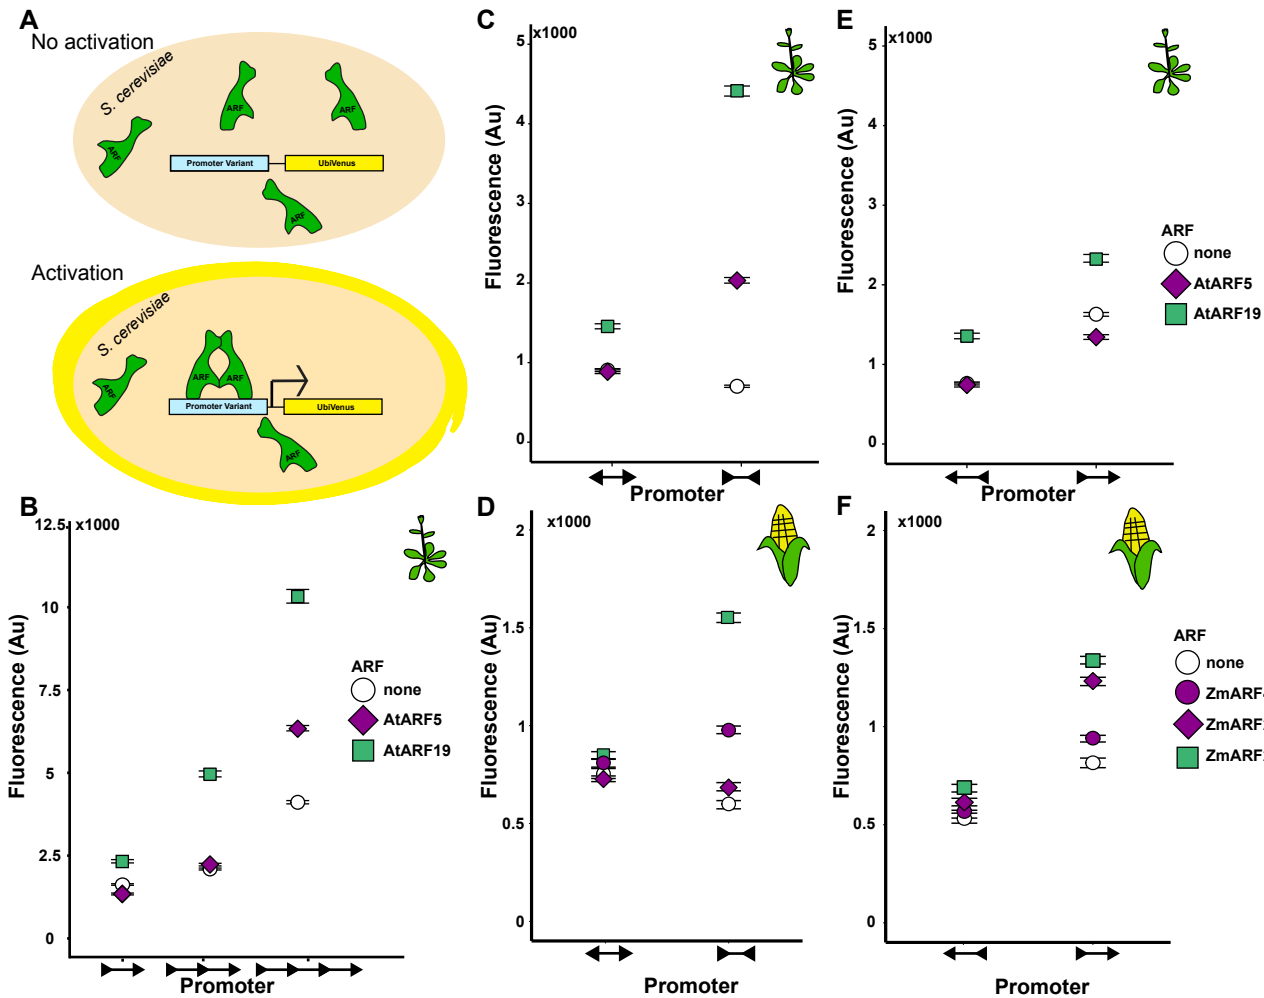

Figure 1 Arabidopsis and maize ARFs share promoter preferences. A) Schematic of yeast engineered to constitutively express ARF proteins and promoter variants. All promoter variants were inserted into the A1 site of a pIAA19 promoter with mutated AuxREs. The transcription start site (TSS) is to the right and arrowheads indicate the orientation of the AuxRE, starting with 5'-TGTC-3'. Fluorescence was measured by flow cytometry with the results depicted as median values and 95% confidence intervals. B) AtARF19 and AtARF5 show strong activation on promoters with four AuxREs (five base pair spacer). C) AtARF19 and AtARF5 show stronger activity on promoters with two AuxREs facing towards each other rather than away from each other (seven base pair spacer). D) ZmARF4, ZmARF27, and ZmARF29 show stronger activity on promoters with two AuxREs facing towards each other rather than away from each other (seven base pair spacer). E) AtARF19 and AtARF5 show stronger activity on promoters where the two AuxREs face towards rather than away from the TSS (five base pair spacer). F) ZmARF4, ZmARF27, and ZmARF29 show stronger activity on promoters where the two AuxREs face towards rather than away from the TSS (five base pair spacer).

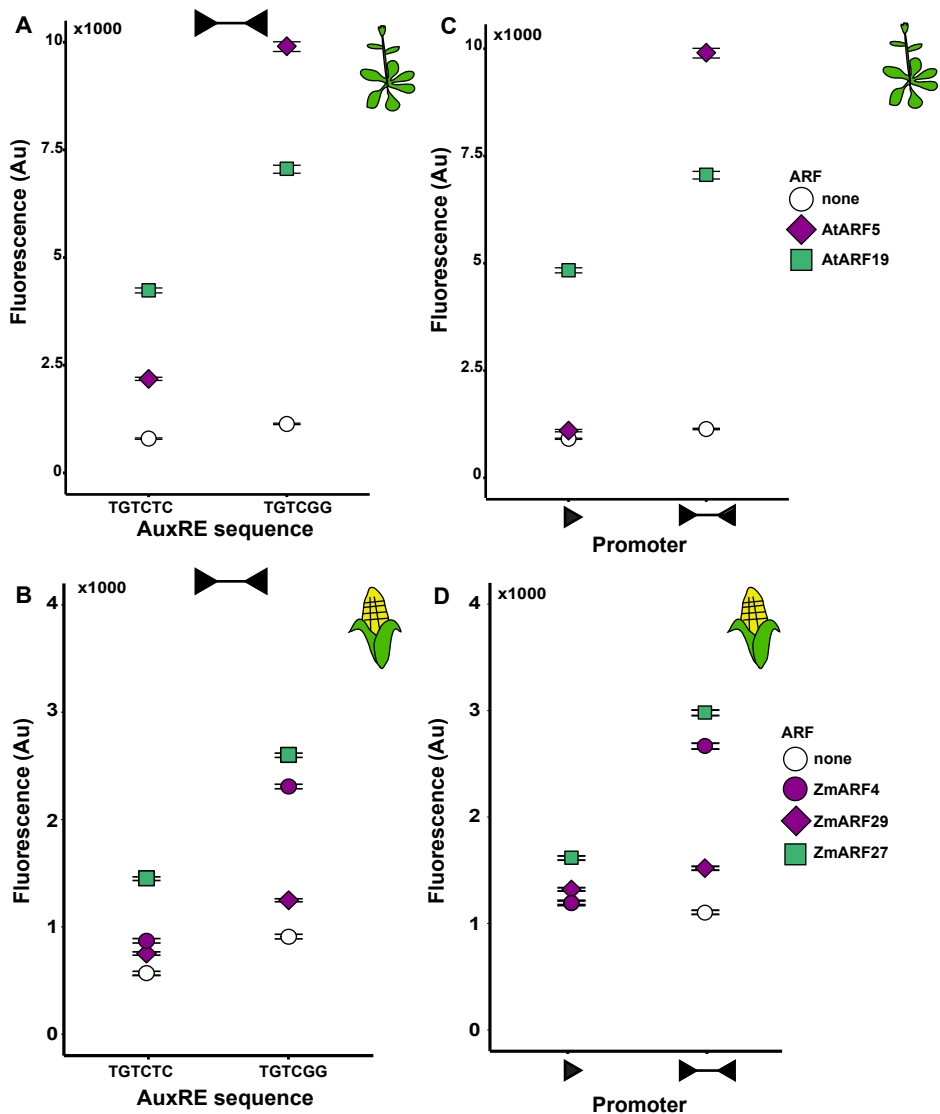

Figure 2 AtARF19 can activate on a single AuxRE of the sequence TGTCGG. A) AtARF5 and AtARF19 activate more strongly on two AuxREs facing each other of the cis-element sequence TGCTC/GAGACA when compared to two AuxREs facing each other of the cis-element sequence TGTCGG/CCGACA. B) AtARF19, but not AtARF5, can induce transcription on a promoter with one AuxRE of the sequence 5'-TGTCGG-3'. C) ZmARF4, ZmARF27, and ZmARF29 activate more strongly on two AuxREs facing each other of the cis-element sequence TGCTC/GAGACA when compared to two AuxREs facing each other of the cis-element sequence TGTCGG/CCGACA. D) None of the tested ZmARFs activate on a single AuxRE with the cis-element sequence 5'-TGTCGG-3'. (The no ARF control data point is directly underneath the ZmARF4 data point).

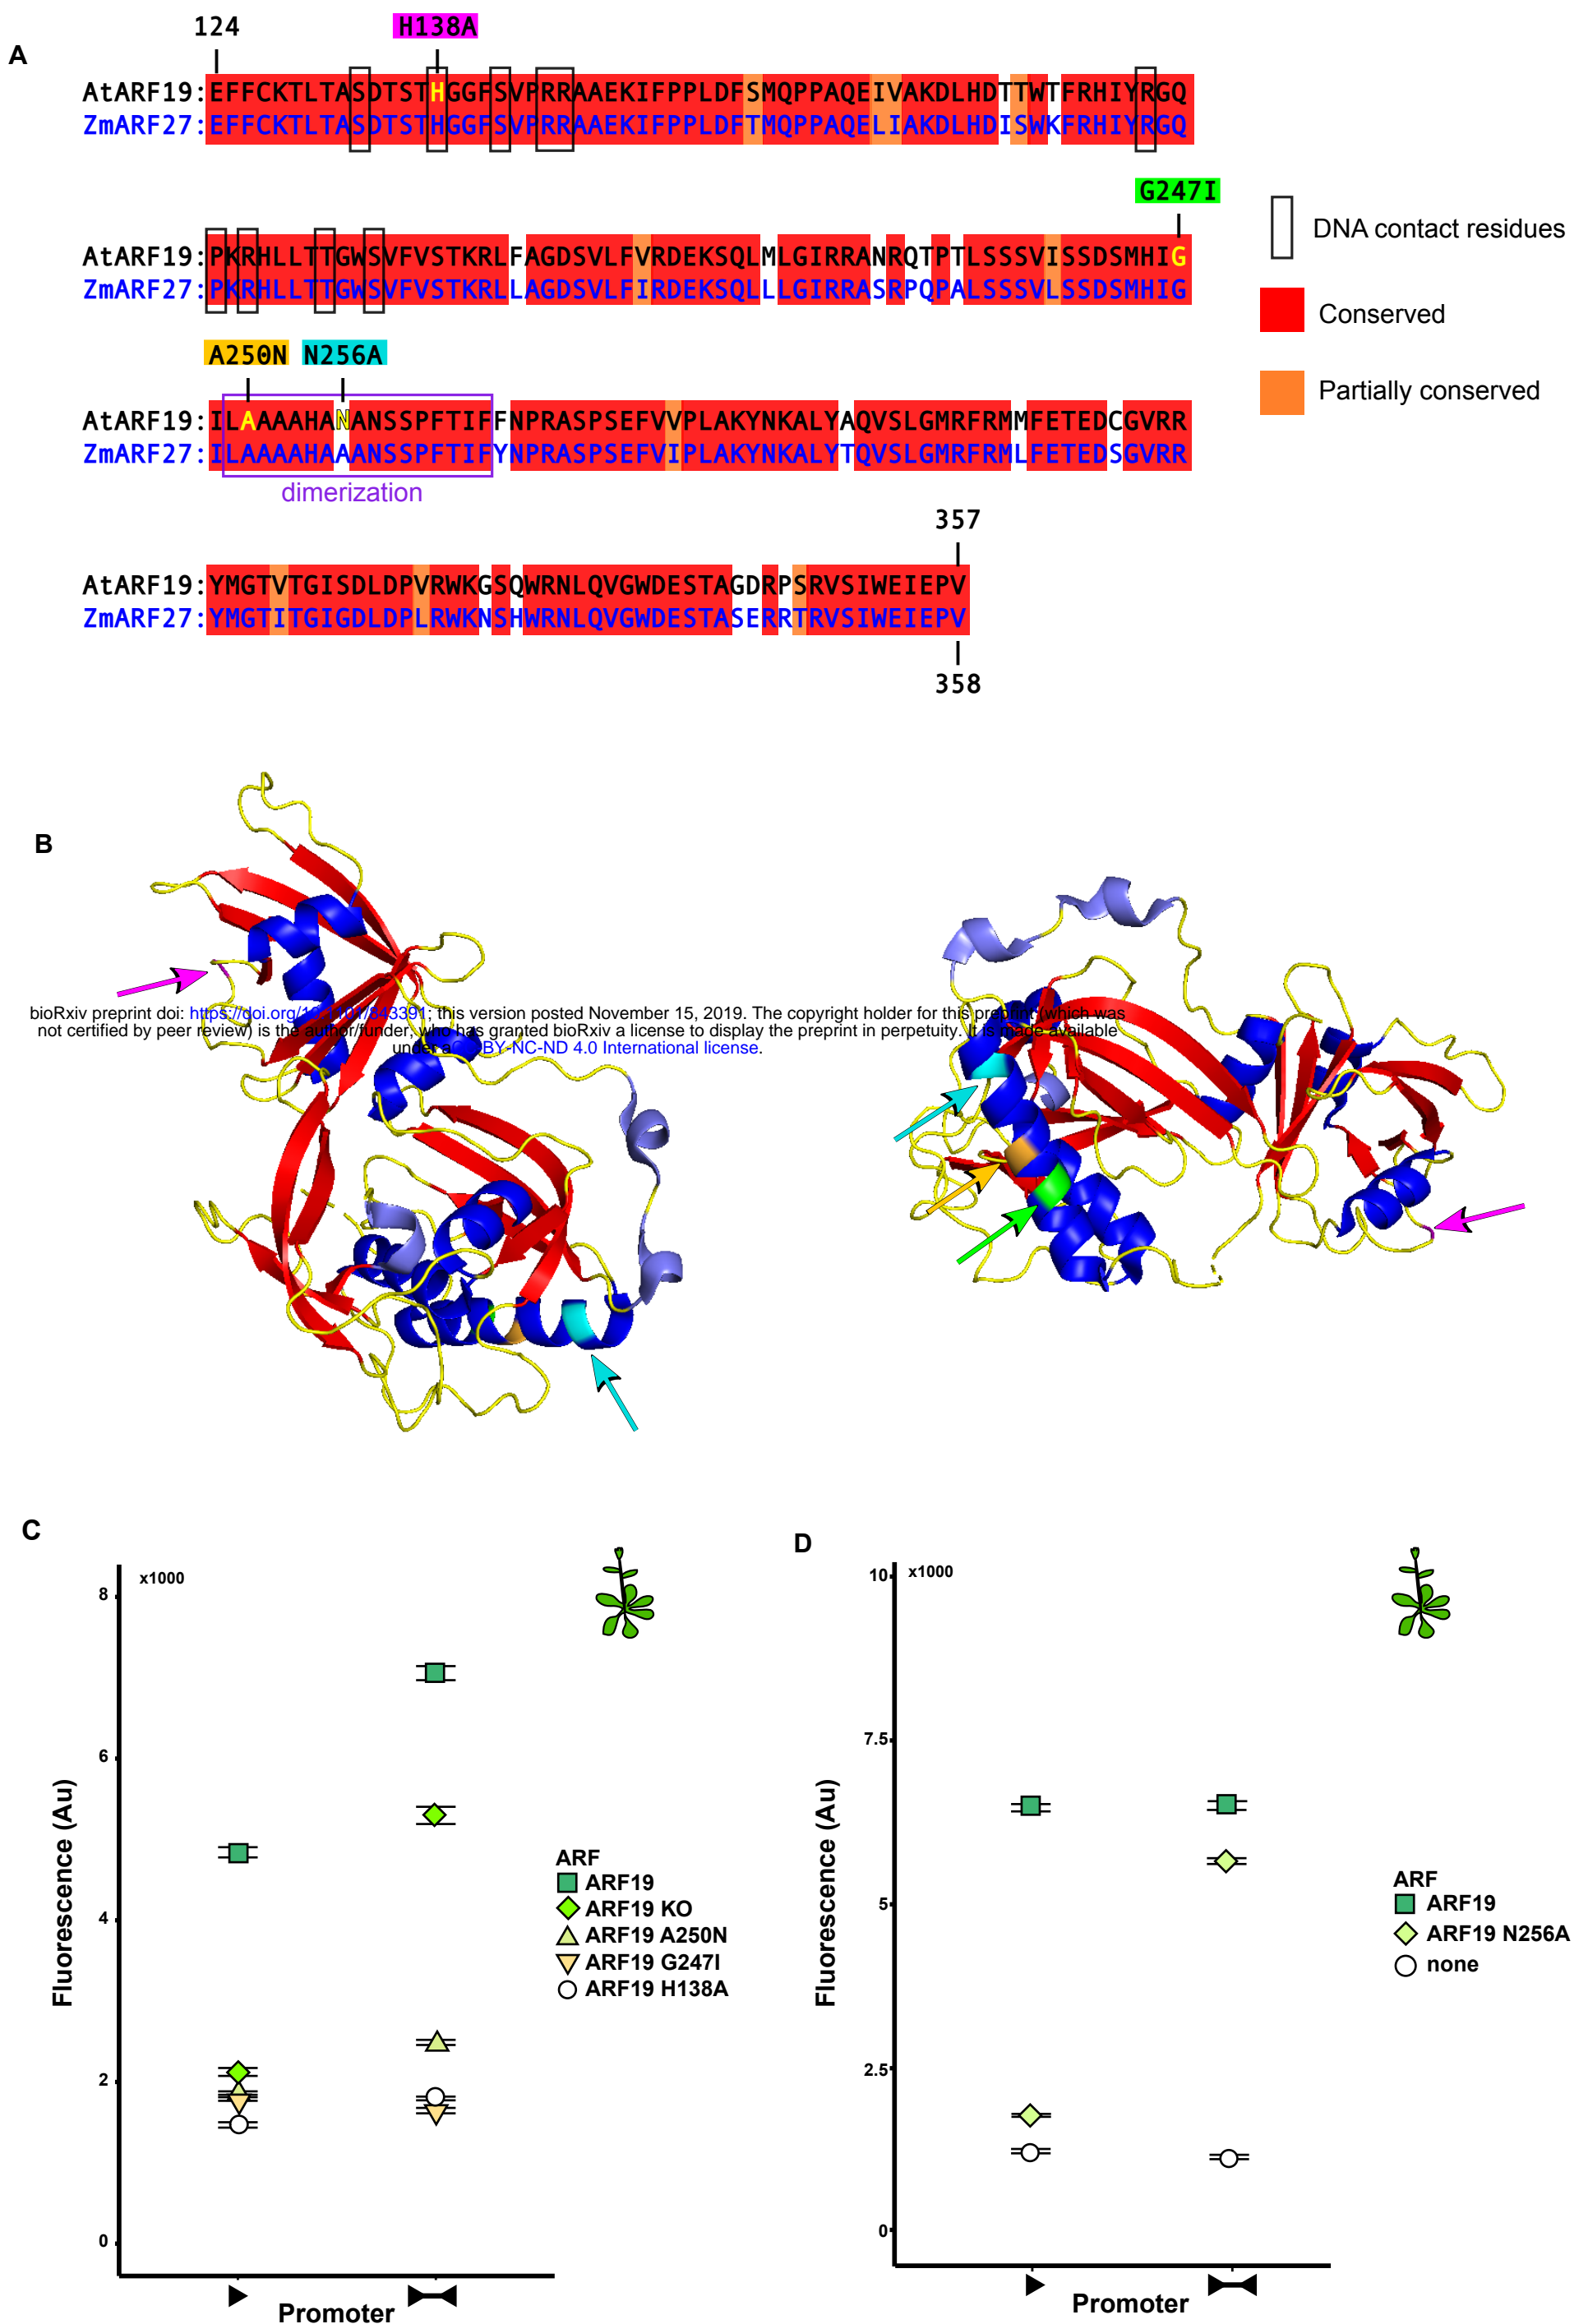

Figure 3 AtARF19 requires dimerization to activate even on a single AuxRE. A) Alignment of the DNA-binding and dimerization domains of AtARF19 and ZmARF27 with relevant mutations highlighted. B) Structure of AtARF5 DNA-binding domain with mutated residues highlighted. C) AtARF19 must dimerize for full activity, even for a promoter with a single AuxRE. The KO mutation disrupts dimerization in the PB1 domain. The A250N and G247I mutations disrupt dimerization at the DD domain, adjacent to the DNA-binding domain. The H138A mutation disrupts the DNA binding domain itself. D) An N256A mutation in AtARF19 causes a total loss of activity on a promoter with one AuxRE (5'-TGTCGG-3'), while leaving activity on two AuxREs largely intact.

## Parsed Citations

Thank you to members of the Nemhauser and Imaizumi labs for helpful discussion and guidance on experimental design and execution. Thank you especially to Manraj Sahota, Mollye Zahler, and Arjun Khakhar for initial experimental work and many discussions. This work was supported by the National Science Foundation (MCB-1411949), and National Institute of Health (R01-GM107084) and the Howard Hughes Medical Institute Faculty Scholar Award. AL was supported by an NSF Graduate Research Fellowship DGE-1256082. MMTT was supported by an NSF Postdoctoral Fellowship in Biology IOS-1609014.

Pubmed: [Author and Title](#)

Google Scholar: [Author Only Title Only Author and Title](#)

### Author Contributions

Experimental design was conceived by AL, MMTT, and JLN. Research was performed by AL, MMTT, and EAO. The manuscript was prepared by AL, MMTT, and JLN.

### One-sentence summary

The plant growth hormone auxin regulates development via a family of transcription factors that share promoter sequence preferences, despite activating different genetic networks.

Ballas N, Wong LM, Theologis A (1993) Identification of the auxin-responsive element, AuxRE, in the primary indoleacetic acid-inducible gene, PS-IAA4/5, of pea (*Pisum sativum*). *J Mol Biol* 233: 580–596

Pubmed: [Author and Title](#)

Google Scholar: [Author Only Title Only Author and Title](#)

Berendzen KW, Weiste C, Wanke D, Kilian J, Harter K, Dröge-Laser W (2012) Bioinformatic cis-element analyses performed in *Arabidopsis* and rice disclose bZIP- and MYB-related binding sites as potential AuxRE-coupling elements in auxin-mediated transcription. *BMC Plant Biol* 12: 125

Pubmed: [Author and Title](#)

Google Scholar: [Author Only Title Only Author and Title](#)

Boer DR, Freire-Rios A, van den Berg WAM, Saaki T, Manfield IW, Kepinski S, López-Vidriero I, Franco-Zorrilla JM, de Vries SC, Solano R, et al (2014) Structural basis for DNA binding specificity by the auxin-dependent ARF transcription factors. *Cell* 156: 577–589

Pubmed: [Author and Title](#)

Google Scholar: [Author Only Title Only Author and Title](#)

Chapman EJ, Estelle M (2009) Mechanism of auxin-regulated gene expression in plants. *Annu Rev Genet* 43: 265–285

Pubmed: [Author and Title](#)

Google Scholar: [Author Only Title Only Author and Title](#)

Cherenkov P, Novikova D, Omelyanchuk N, Levitsky V, Grosse I, Weijers D, Mironova V (2018) Diversity of cis-regulatory elements associated with auxin response in *Arabidopsis thaliana*. *J Exp Bot* 69: 329–339

Pubmed: [Author and Title](#)

Google Scholar: [Author Only Title Only Author and Title](#)

Galli M, Liu Q, Moss BL, Malcomber S, Li W, Gaines C, Federici S, Roshkovan J, Meeley R, Nemhauser JL, et al (2015) Auxin signaling modules regulate maize inflorescence architecture. *Proc Natl Acad Sci U S A* 112: 13372–13377

Pubmed: [Author and Title](#)

Google Scholar: [Author Only Title Only Author and Title](#)

Galli M, Khakhar A, Lu Z, Chen Z, Sen S, Joshi T, Nemhauser JL, Schmitz RJ, Gallavotti A (2018) The DNA binding landscape of the maize AUXIN RESPONSE FACTOR family. *Nature Communications* 9: 4526

Pubmed: [Author and Title](#)

Google Scholar: [Author Only Title Only Author and Title](#)

Grigolon S, Bravi B, Martin OC (2018) Responses to auxin signals: an operating principle for dynamical sensitivity yet high resilience. *R Soc Open Sci* 5: 172098

Pubmed: [Author and Title](#)

Google Scholar: [Author Only Title Only Author and Title](#)

Guilfoyle TJ, Hagen G (2007) Auxin response factors. *Curr Opin Plant Biol* 10: 453–460

Pubmed: [Author and Title](#)

Google Scholar: [Author Only Title Only Author and Title](#)

Hardtke CS, Berleth T (1998) The *Arabidopsis* gene MONOPTEROS encodes a transcription factor mediating embryo axis formation and vascular development. *EMBO J* 17: 1405–1411

Pubmed: [Author and Title](#)

Google Scholar: [Author Only Title Only Author and Title](#)

Havens KA, Guseman JM, Jang SS, Pierre-Jerome E, Bolten N, Klavins E, Nemhauser JL (2012) A Synthetic Approach Reveals Extensive Tunability of Auxin Signaling. *Plant Physiol* 160: 135–142

Pubmed: [Author and Title](#)

Google Scholar: [Author Only Title Only Author and Title](#)

Ito J, Fukaki H, Onoda M, Li L, Li C, Tasaka M, Furutani M (2016) Auxin-dependent compositional change in Mediator in ARF7- and ARF19-mediated transcription. *Proc Natl Acad Sci* 113: 6562–6567

Pubmed: [Author and Title](#)

Google Scholar: [Author Only](#) [Title Only](#) [Author and Title](#)

Korasick DA1, Westfall CS, Lee SG, Nanao MH, Dumas R, Hagen G, Guilfoyle TJ, Jez JM, Strader LC.(2014)Molecular basis for AUXIN RESPONSE FACTOR protein interaction and the control of auxin response repression. *Proc Natl Acad Sci U S A* 111: 5427-32

Pubmed: [Author and Title](#)

Google Scholar: [Author Only](#) [Title Only](#) [Author and Title](#)

Krogan NT, Marcos D, Weiner AI, Berleth T.(2016) The Auxin Response Factor MONOPTEROS controls meristem function and organogenesis in both the shoot and root through the direct regulation of PIN genes. *New Phytol* 212: 42–50

Pubmed: [Author and Title](#)

Google Scholar: [Author Only](#) [Title Only](#) [Author and Title](#)

Liao CY, Smet W, Brunoud G, Yoshida S, Vernoux T, Weijers D. (2015) Reporters for sensitive and quantitative measurement of auxin response. *Nat Methods* 12:207-10

Pubmed: [Author and Title](#)

Google Scholar: [Author Only](#) [Title Only](#) [Author and Title](#)

Lieberman-Lazarovich M, Yahav C, Israeli A, Efroni I. (2019) Deep conservation of cis-element variants regulating plant hormonal responses. *Plant Cell Epub ahead of print*

Pubmed: [Author and Title](#)

Google Scholar: [Author Only](#) [Title Only](#) [Author and Title](#)

McKeown AN, Bridgham JT, Anderson DW, Murphy MN, Ortlund EA, Thornton JW (2014) Evolution of DNA specificity in a transcription factor family produced a new gene regulatory module. *Cell* 159: 58–68

Pubmed: [Author and Title](#)

Google Scholar: [Author Only](#) [Title Only](#) [Author and Title](#)

Mironova W, Omelyanchuk NA, Wiebe DS, Levitsky VG (2014) Computational analysis of auxin responsive elements in the Arabidopsis thaliana L. genome. *BMC Genomics* 15: S4

Pubmed: [Author and Title](#)

Google Scholar: [Author Only](#) [Title Only](#) [Author and Title](#)

Nanao MH, Vinos-Poyo T, Brunoud G, Thévenon E, Mazzoleni M, Mast D, Lainé S, Wang S, Hagen G, Li H, Guilfoyle TJ, Parcy F, Vernoux T, Dumas R. (2014) Structural basis for oligomerization of auxin transcriptional regulators. *Nat. Communications* 5:3617.

Pubmed: [Author and Title](#)

Google Scholar: [Author Only](#) [Title Only](#) [Author and Title](#)

Oh E, Zhu J-Y, Bai M-Y, Arenhart RA, Sun Y, Wang Z-Y (2014) Cell elongation is regulated through a central circuit of interacting transcription factors in the Arabidopsis hypocotyl. *eLife*. doi: 10.7554/eLife.03031

Pubmed: [Author and Title](#)

Google Scholar: [Author Only](#) [Title Only](#) [Author and Title](#)

Okushima Y, Fukaki H, Onoda M, Theologis A, Tasaka M (2007) ARF7 and ARF19 Regulate Lateral Root Formation via Direct Activation of LBD/ASL Genes in Arabidopsis. *Plant Cell* 19: 118–130

Pubmed: [Author and Title](#)

Google Scholar: [Author Only](#) [Title Only](#) [Author and Title](#)

Okushima Y, Overvoorde PJ, Arima K, Alonso JM, Chan A, Chang C, Ecker JR, Hughes B, Lui A, Nguyen D, et al (2005) Functional Genomic Analysis of the AUXIN RESPONSE FACTOR Gene Family Members in Arabidopsis thaliana: Unique and Overlapping Functions of ARF7 and ARF19. *Plant Cell* 17: 444–463

Pubmed: [Author and Title](#)

Google Scholar: [Author Only](#) [Title Only](#) [Author and Title](#)

O'Malley RC, Huang SC, Song L, Lewsey MG, Bartlett A, Nery JR, Galli M, Gallavotti A, Ecker JR (2016) Cistrome and Epicistrome Features Shape the Regulatory DNA Landscape. *Cell* 165: 1280–1292

Pubmed: [Author and Title](#)

Google Scholar: [Author Only](#) [Title Only](#) [Author and Title](#)

Para A, Li Y, Marshall-Colón A, Varala K, Francoeur NJ, Moran TM, Edwards MB, Hackley C, Bargmann BOR, Birnbaum KD, et al (2014) Hit-and-run transcriptional control by bZIP1 mediates rapid nutrient signaling in Arabidopsis. *Proc Natl Acad Sci U S A* 111: 10371–10376

Pubmed: [Author and Title](#)

Google Scholar: [Author Only](#) [Title Only](#) [Author and Title](#)

Pierre-Jerome E, Jang SS, Havens KA, Nemhauser JL, Klavins E (2014) Recapitulation of the forward nuclear auxin response pathway in yeast. *Proc Natl Acad Sci U S A* 111: 9407–9412

Pubmed: [Author and Title](#)

Google Scholar: [Author Only](#) [Title Only](#) [Author and Title](#)

Pierre-Jerome E, Moss BL, Lanctot A, Hageman A, Nemhauser JL (2016) Functional analysis of molecular interactions in synthetic auxin response circuits. *Proc Natl Acad Sci U S A* 113: 11354–11359

Pubmed: [Author and Title](#)

Google Scholar: [Author Only](#) [Title Only](#) [Author and Title](#)

**Rademacher EH, Möller B, Lokerse AS, Llavata-Peris CI, van den Berg W, Weijers D (2011) A cellular expression map of the Arabidopsis AUXIN RESPONSE FACTOR gene family. Plant J Cell Mol Biol 68: 597–606**

Pubmed: [Author and Title](#)

Google Scholar: [Author Only Title Only Author and Title](#)

**Remington DL, Vision TJ, Guilfoyle TJ, Reed JW (2004) Contrasting Modes of Diversification in the Aux/IAA and ARF Gene Families. Plant Physiol 135: 1738–1752**

Pubmed: [Author and Title](#)

Google Scholar: [Author Only Title Only Author and Title](#)

**Ripoll J, Bailey LJ, Mai Q-A, Wu SL, Hon CT, Chapman EJ, Ditta GS, Estelle M, Yanofsky MF (2015) microRNA regulation of fruit growth. Nat Plants 1: 15036**

Pubmed: [Author and Title](#)

Google Scholar: [Author Only Title Only Author and Title](#)

**Schlereth A, Möller B, Liu W, Kientz M, Flipse J, Rademacher EH, Schmid M, Jürgens G, Weijers D (2010) MONOPTEROS controls embryonic root initiation by regulating a mobile transcription factor. Nature 464: 913–916**

Pubmed: [Author and Title](#)

Google Scholar: [Author Only Title Only Author and Title](#)

**Shin R, Burch AY, Huppert KA, Tiwari SB, Murphy AS, Guilfoyle TJ, Schachtman DP (2007) The Arabidopsis transcription factor MYB77 modulates auxin signal transduction. Plant Cell 19: 2440–2453**

Pubmed: [Author and Title](#)

Google Scholar: [Author Only Title Only Author and Title](#)

**Ulmasov T, Hagen G, Guilfoyle TJ (1997a) ARF1, a transcription factor that binds to auxin response elements. Science 276: 1865–1868**

Pubmed: [Author and Title](#)

Google Scholar: [Author Only Title Only Author and Title](#)

**Ulmasov T, Liu ZB, Hagen G, Guilfoyle TJ (1995) Composite structure of auxin response elements. Plant Cell 7: 1611–1623**

Pubmed: [Author and Title](#)

Google Scholar: [Author Only Title Only Author and Title](#)

**Ulmasov T, Murfett J, Hagen G, Guilfoyle TJ (1997b) Aux/IAA proteins repress expression of reporter genes containing natural and highly active synthetic auxin response elements. Plant Cell 9: 1963–1971**

Pubmed: [Author and Title](#)

Google Scholar: [Author Only Title Only Author and Title](#)

**Varaud E, Brioudes F, Szécsi J, Leroux J, Brown S, Perrot-Rechenmann C, Bendahmane M (2011) AUXIN RESPONSE FACTOR8 regulates Arabidopsis petal growth by interacting with the bHLH transcription factor BIGPETALp. Plant Cell 23: 973–983**

Pubmed: [Author and Title](#)

Google Scholar: [Author Only Title Only Author and Title](#)

**Vernoux T, Brunoud G, Farcot E, Morin V, Van den Daele H, Legrand J, Oliva M, Das P, Larrieu A, Wells D, et al (2011) The auxin signalling network translates dynamic input into robust patterning at the shoot apex. Mol Syst Biol 7: 508**

Pubmed: [Author and Title](#)

Google Scholar: [Author Only Title Only Author and Title](#)

**Wilmoth JC, Wang S, Tiwari SB, Joshi AD, Hagen G, Guilfoyle TJ, Alonso JM, Ecker JR, Reed JW (2005) NPH4/ARF7 and ARF19 promote leaf expansion and auxin-induced lateral root formation. Plant J Cell Mol Biol 43: 118–130**

Pubmed: [Author and Title](#)

Google Scholar: [Author Only Title Only Author and Title](#)

**Wu M-F, Yamaguchi N, Xiao J, Bargmann B, Estelle M, Sang Y, Wagner D (2015) Auxin-regulated chromatin switch directs acquisition of flower primordium founder fate. eLife. doi: 10.7554/eLife.09269**

Pubmed: [Author and Title](#)

Google Scholar: [Author Only Title Only Author and Title](#)
